# Supplementary material for: Characterization of cellular senescence mechanisms in human corneal endothelial cells
Source: PubMed Central journal article supplement (PMC3440103; doi:10.1111/j.1474-9726.2011.00776.x), 2012-04
Supplement: acel0011-0234-SD5.pdf [file acel0011-0234-SD5.pdf]

**a**

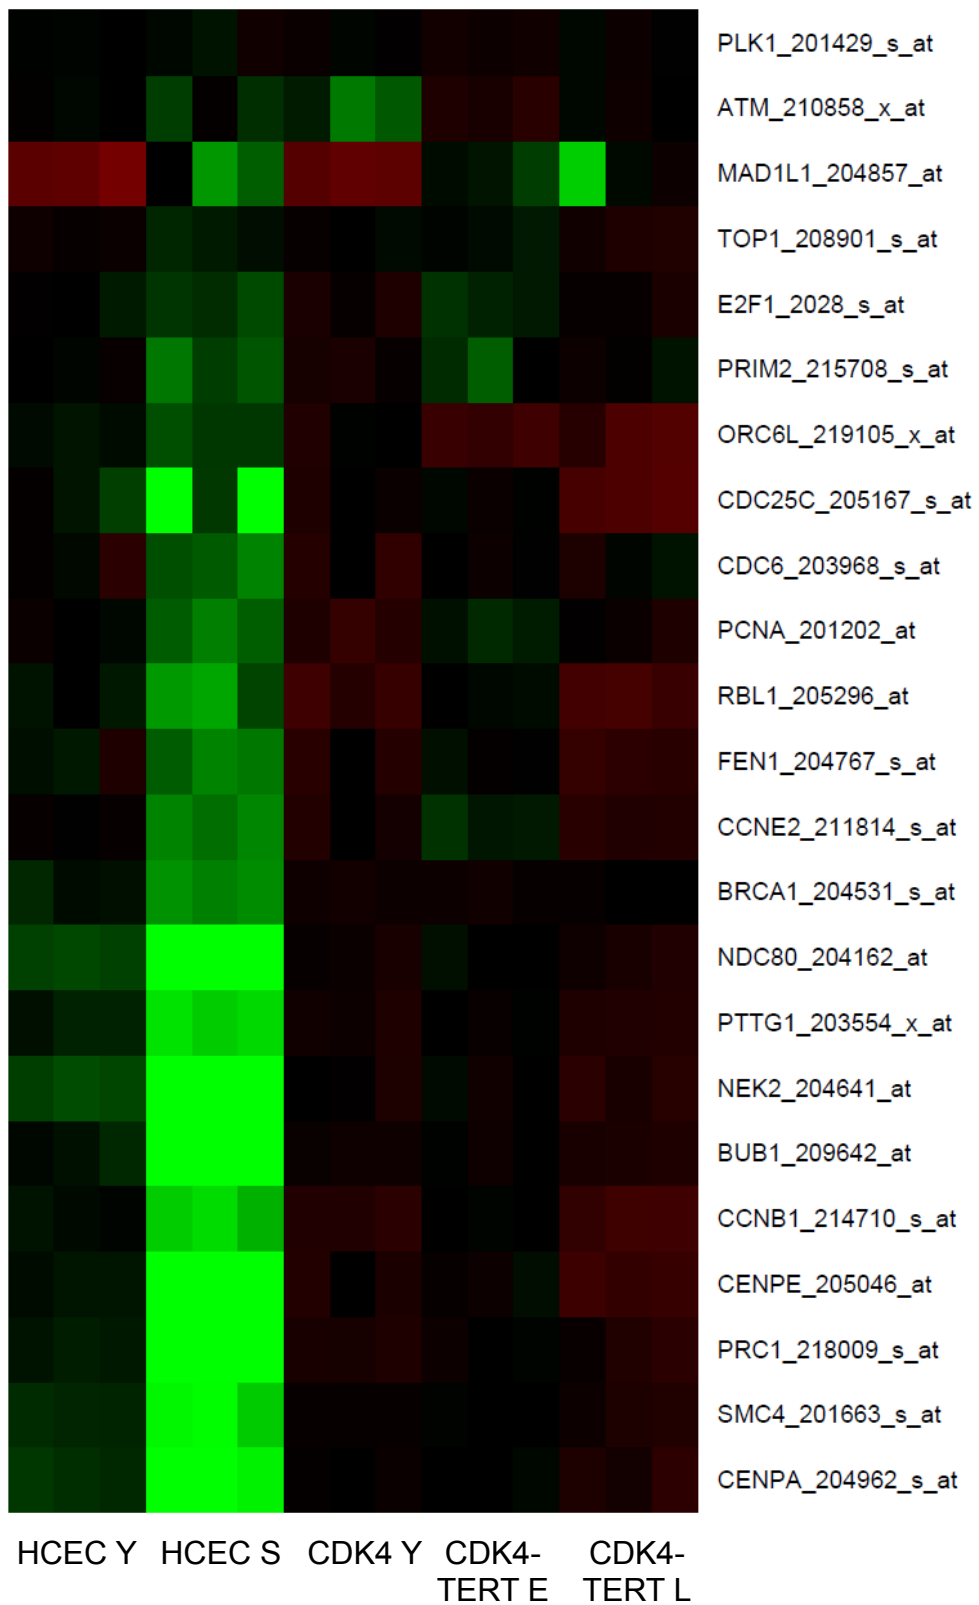

**b**

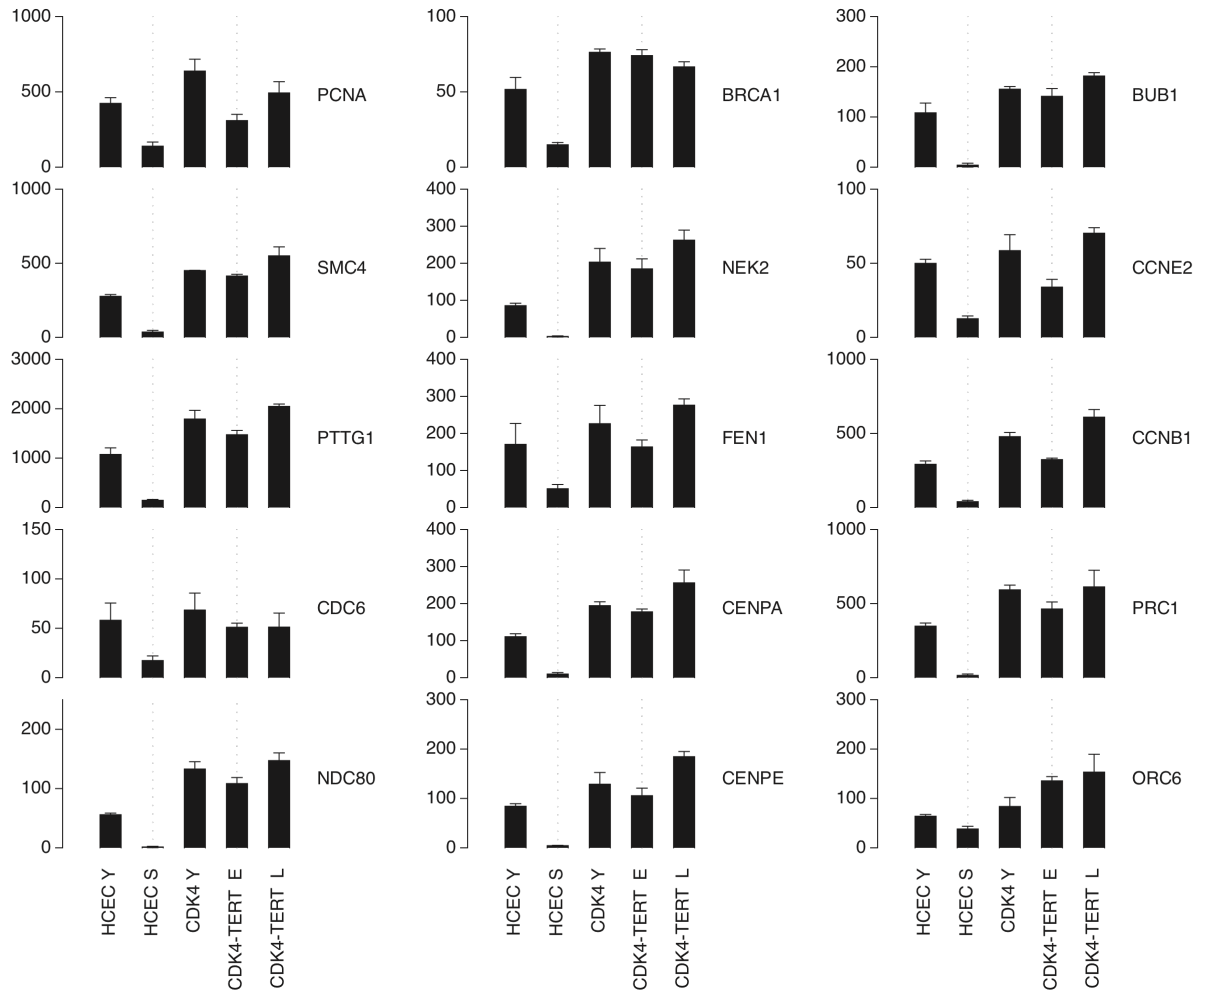

**C**

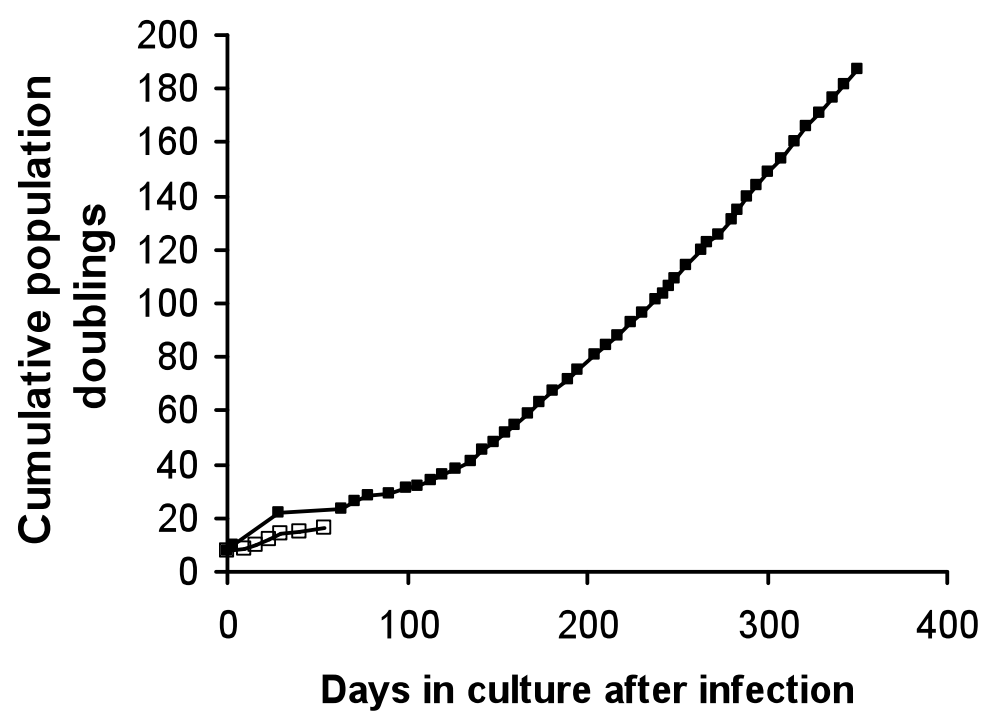

## Figure S5 Legend

### **Expression of E2F target genes is maintained and elevated in HCEC-CDK4 and HCEC-CDK4-TERT cells**

Microarray data (see Experimental Methods) was used to examine the expression of a series of previously-defined E2F transcriptional targets (Blais & Dynlacht 2004) in young primary HCEC (HCEC Y; PD10), senescent primary HCEC (HCEC S: PD29), HCEC-CDK4 (CDK4 Y; PD38), and immortalised HCEC-CDK4-TERT cells at PD53 (CDK4-TERT E) and PD193 (CDK4-TERT L). The colour scheme in **a)** indicates expression in log<sub>2</sub>-space for each probeset relative to the experiment-wide (i.e. row) median such that red indicates upregulation and green indicates lower expression relative to the median. In **b)** the error bars show the standard deviation of  $n=3$  samples.

### **Forced expression of exogenous CDK4 and hTERT by simultaneous infection resulted in an immortal HCEC line**

HCEC strain 288/97 was infected at a replicative age of 8 population doublings with retroviral vectors containing human CDK4 and TERT genes respectively and cultured as described in Experimental Methods. In **c)** the chart shows the growth curve of the bulk culture. ■ HCEC-CDK4-hTERT; □ empty vector control.
