# Supplementary material for: Characterization of cellular senescence mechanisms in human corneal endothelial cells
Source: PubMed Central journal article supplement (PMC3440103; doi:10.1111/j.1474-9726.2011.00776.x), 2012-04
Supplement: acel0011-0234-SD8.pdf [file acel0011-0234-SD8.pdf]

| Elevated expression retained in immortalised HCEC-CDK4-TERT? | Probe Set ID | Gene Symbol | Gene Title                                                                              | GO Biological Process                                                                                                                                                                                                                                                                                                                                                                                                                                                                                                                                                                                                                                                                               | GO Molecular Function                                                                                                                                                                                                                                                                                                                                                                                                                                                                                                          | GO Cellular Component                                                                                                                                                                                                                                                                                                                                                                                                                                                                                                                                       |
|--------------------------------------------------------------|--------------|-------------|-----------------------------------------------------------------------------------------|-----------------------------------------------------------------------------------------------------------------------------------------------------------------------------------------------------------------------------------------------------------------------------------------------------------------------------------------------------------------------------------------------------------------------------------------------------------------------------------------------------------------------------------------------------------------------------------------------------------------------------------------------------------------------------------------------------|--------------------------------------------------------------------------------------------------------------------------------------------------------------------------------------------------------------------------------------------------------------------------------------------------------------------------------------------------------------------------------------------------------------------------------------------------------------------------------------------------------------------------------|-------------------------------------------------------------------------------------------------------------------------------------------------------------------------------------------------------------------------------------------------------------------------------------------------------------------------------------------------------------------------------------------------------------------------------------------------------------------------------------------------------------------------------------------------------------|
| Y                                                            | 204719_at    | ABCA8       | ATP-binding cassette, sub-family A (ABC1), member 8                                     | transport /// transport                                                                                                                                                                                                                                                                                                                                                                                                                                                                                                                                                                                                                                                                             | nucleotide binding /// ATP binding /// ATPase activity /// nucleoside-triphosphatase activity /// ATPase activity, coupled to transmembrane movement of substances                                                                                                                                                                                                                                                                                                                                                             | plasma membrane /// membrane /// integral to membrane                                                                                                                                                                                                                                                                                                                                                                                                                                                                                                       |
| Y                                                            | 209160_at    | AKR1C3      | aldo-keto reductase family 1, member C3 (3-alpha hydroxysteroid dehydrogenase, type II) | prostaglandin metabolic process /// oxidation reduction /// oxidation reduction                                                                                                                                                                                                                                                                                                                                                                                                                                                                                                                                                                                                                     | aldo-keto reductase activity /// oxidoreductase activity /// prostaglandin-F synthase activity /// 3-alpha-hydroxysteroid dehydrogenase (A-specific) activity /// testosterone 17-beta-dehydrogenase (NADP+) activity /// trans-1,2-dihydrobenzene-1,2-diol dehydrogenase activity /// indanol dehydrogenase activity /// testosterone 17-beta-dehydrogenase activity /// carbonate dehydratase activity /// carbonate dehydratase activity /// zinc ion binding /// zinc ion binding /// lyase activity /// metal ion binding | intracellular /// cytoplasm                                                                                                                                                                                                                                                                                                                                                                                                                                                                                                                                 |
| Y                                                            | 214164_x_at  | CA12        | carbonic anhydrase XII                                                                  | one-carbon metabolic process<br>release of cytochrome c from mitochondria /// lipid metabolic process /// apoptosis /// anti-apoptosis /// response to stress /// complement activation /// complement activation, classical pathway /// response to oxidative stress /// cell death /// positive regulation of cell proliferation /// response to wounding /// response to virus /// endocrine pancreas development /// negative regulation of protein homooligomerization /// negative regulation of apoptosis /// reverse cholesterol transport /// innate immune response /// positive regulation of cell differentiation /// neuron projection morphogenesis /// response to misfolded protein | protein binding /// protein binding /// misfolded protein binding                                                                                                                                                                                                                                                                                                                                                                                                                                                              | membrane /// integral to membrane /// integral to membrane<br>extracellular region /// extracellular space /// mitochondrion /// aggresome /// extracellular matrix /// spherical high-density lipoprotein particle /// perinuclear region of cytoplasm<br>extracellular region /// proteinaceous extracellular matrix /// collagen type VI /// extracellular matrix /// extracellular matrix /// sarcolemma                                                                                                                                                |
| Y                                                            | 208791_at    | CLU         | clusterin                                                                               | cell adhesion /// cell adhesion<br>chemotaxis /// inflammatory response /// inflammatory response /// immune response /// signal transduction /// G-protein coupled receptor protein signaling pathway /// nervous system development /// cell proliferation /// negative regulation of cell proliferation /// intracellular signaling pathway /// actin cytoskeleton organization                                                                                                                                                                                                                                                                                                                  | platelet-derived growth factor binding<br>receptor binding /// cytokine activity /// chemokine activity /// chemokine activity /// enzyme activator activity /// growth factor activity                                                                                                                                                                                                                                                                                                                                        | extracellular region /// extracellular region /// extracellular space /// extracellular space                                                                                                                                                                                                                                                                                                                                                                                                                                                               |
| Y                                                            | 213428_s_at  | COL6A1      | collagen, type VI, alpha 1                                                              | chemotaxis /// chemotaxis /// inflammatory response /// immune response /// signal transduction /// cell-cell signaling                                                                                                                                                                                                                                                                                                                                                                                                                                                                                                                                                                             | cytokine activity /// chemokine activity /// chemokine activity /// heparin binding                                                                                                                                                                                                                                                                                                                                                                                                                                            | extracellular region /// extracellular region /// extracellular space                                                                                                                                                                                                                                                                                                                                                                                                                                                                                       |
| Y                                                            | 204470_at    | CXCL1       | chemokine (C-X-C motif) ligand 1 (melanoma growth stimulating activity, alpha)          | chemotaxis /// chemotaxis /// inflammatory response /// immune response /// signal transduction /// cell-cell signaling                                                                                                                                                                                                                                                                                                                                                                                                                                                                                                                                                                             | receptor binding /// cytokine activity /// chemokine activity /// chemokine activity /// heparin binding                                                                                                                                                                                                                                                                                                                                                                                                                       | extracellular region /// extracellular region /// extracellular space                                                                                                                                                                                                                                                                                                                                                                                                                                                                                       |
| Y                                                            | 206336_at    | CXCL6       | chemokine (C-X-C motif) ligand 6 (granulocyte chemotactic protein 2)                    | cell adhesion /// negative regulation of cell growth /// intracellular receptor mediated signaling pathway /// wound healing                                                                                                                                                                                                                                                                                                                                                                                                                                                                                                                                                                        | ---                                                                                                                                                                                                                                                                                                                                                                                                                                                                                                                            | integral to plasma membrane /// cell surface /// membrane /// integral to membrane<br>extracellular region /// membrane fraction /// soluble fraction /// endoplasmic reticulum /// Golgi apparatus /// plasma membrane /// plasma membrane /// cell surface /// cell surface /// membrane /// integral to membrane /// apical plasma membrane /// apical plasma membrane /// lamellipodium /// cell junction /// endocytic vesicle /// lamellipodium membrane /// cell projection /// membrane raft /// intercellular canalculus /// invadopodium membrane |
| Y                                                            | 213865_at    | DCBLD2      | discoidin, CUB and LCCL domain containing 2                                             | response to hypoxia /// regulation of T cell mediated immunity /// proteolysis /// cell adhesion /// positive regulation of cell proliferation /// negative regulation of extracellular matrix disassembly /// T cell costimulation /// regulation of cell-cell adhesion mediated by integrin /// T cell activation /// endothelial cell migration /// establishment of localization                                                                                                                                                                                                                                                                                                                | protease binding /// aminopeptidase activity /// serine-type endopeptidase activity /// receptor activity /// receptor binding /// protein binding /// collagen binding /// peptidase activity /// serine-type peptidase activity /// serine-type peptidase activity /// dipeptidyl-peptidase activity /// dipeptidyl-peptidase activity /// hydrolase activity /// peptide binding /// protein homodimerization activity /// protein homodimerization activity                                                                | integral to plasma membrane /// cell surface /// membrane /// integral to membrane<br>extracellular region /// membrane fraction /// soluble fraction /// endoplasmic reticulum /// Golgi apparatus /// plasma membrane /// plasma membrane /// cell surface /// cell surface /// membrane /// integral to membrane /// apical plasma membrane /// apical plasma membrane /// lamellipodium /// cell junction /// endocytic vesicle /// lamellipodium membrane /// cell projection /// membrane raft /// intercellular canalculus /// invadopodium membrane |
| Y                                                            | 203717_at    | DPP4        | dipeptidyl-peptidase 4                                                                  | response to hypoxia /// regulation of T cell mediated immunity /// proteolysis /// cell adhesion /// positive regulation of cell proliferation /// negative regulation of extracellular matrix disassembly /// T cell costimulation /// regulation of cell-cell adhesion mediated by integrin /// T cell activation /// endothelial cell migration /// establishment of localization                                                                                                                                                                                                                                                                                                                | protease binding /// aminopeptidase activity /// serine-type endopeptidase activity /// receptor activity /// receptor binding /// protein binding /// collagen binding /// peptidase activity /// serine-type peptidase activity /// serine-type peptidase activity /// dipeptidyl-peptidase activity /// dipeptidyl-peptidase activity /// hydrolase activity /// peptide binding /// protein homodimerization activity /// protein homodimerization activity                                                                | integral to plasma membrane /// cell surface /// membrane /// integral to membrane<br>extracellular region /// membrane fraction /// soluble fraction /// endoplasmic reticulum /// Golgi apparatus /// plasma membrane /// plasma membrane /// cell surface /// cell surface /// membrane /// integral to membrane /// apical plasma membrane /// apical plasma membrane /// lamellipodium /// cell junction /// endocytic vesicle /// lamellipodium membrane /// cell projection /// membrane raft /// intercellular canalculus /// invadopodium membrane |

|   |             |        |                                                        |                                                                                                                                                                                                                                                                                                                                                                                                                                                                                                                                                                                                                                                                                                                                                                                                                                                                                                                                                                                                                                                                                                                                                                                                                                                                                                                                                                                                                         |                                                                                                                                                                                                                                                                                                           |                                                                                                                                                                  |
|---|-------------|--------|--------------------------------------------------------|-------------------------------------------------------------------------------------------------------------------------------------------------------------------------------------------------------------------------------------------------------------------------------------------------------------------------------------------------------------------------------------------------------------------------------------------------------------------------------------------------------------------------------------------------------------------------------------------------------------------------------------------------------------------------------------------------------------------------------------------------------------------------------------------------------------------------------------------------------------------------------------------------------------------------------------------------------------------------------------------------------------------------------------------------------------------------------------------------------------------------------------------------------------------------------------------------------------------------------------------------------------------------------------------------------------------------------------------------------------------------------------------------------------------------|-----------------------------------------------------------------------------------------------------------------------------------------------------------------------------------------------------------------------------------------------------------------------------------------------------------|------------------------------------------------------------------------------------------------------------------------------------------------------------------|
| Y | 204464_s_at | EDNRA  | endothelin receptor type A                             | <p>patterning of blood vessels /// response to hypoxia /// in utero embryonic development /// positive regulation of protein phosphorylation /// smooth muscle contraction /// smooth muscle contraction /// signal transduction /// signal transduction /// G-protein coupled receptor protein signaling pathway /// G-protein coupled receptor protein signaling pathway /// activation of adenylate cyclase activity /// activation of phospholipase C activity /// elevation of cytosolic calcium ion concentration /// elevation of cytosolic calcium ion concentration /// activation of protein kinase C activity by G-protein coupled receptor protein signaling pathway /// heart development /// respiratory gaseous exchange /// respiratory gaseous exchange /// cell proliferation /// cell proliferation /// neural crest cell development /// artery smooth muscle contraction /// glucose transport /// glucose transport /// negative regulation of cAMP biosynthetic process /// vasoconstriction /// vasoconstriction /// response to morphine /// regulation of epithelial cell proliferation /// positive regulation of inflammatory response /// positive regulation of release of sequestered calcium ion into cytosol /// elevation of cytosolic calcium ion concentration involved in G-protein signaling coupled to IP3 second messenger /// positive regulation of calcium ion transport</p> | <p>endothelin-A receptor activity /// endothelin-A receptor activity /// phosphoinositide phospholipase C activity /// signal transducer activity /// receptor activity /// G-protein coupled receptor activity /// endothelin receptor activity /// endothelin receptor activity /// protein binding</p> | <p>plasma membrane /// plasma membrane /// integral to plasma membrane /// membrane /// membrane /// integral to membrane /// T-tubule /// nuclear membrane</p>  |
| Y | 202218_s_at | FADS2  | fatty acid desaturase 2                                | <p>lipid metabolic process /// fatty acid biosynthetic process /// unsaturated fatty acid biosynthetic process /// transport /// lipid biosynthetic process /// electron transport chain /// oxidation reduction</p>                                                                                                                                                                                                                                                                                                                                                                                                                                                                                                                                                                                                                                                                                                                                                                                                                                                                                                                                                                                                                                                                                                                                                                                                    | <p>stearoyl-CoA 9-desaturase activity /// iron ion binding /// oxidoreductase activity /// oxidoreductase activity, acting on paired donors, with oxidation of a pair of donors resulting in the reduction of molecular oxygen to two molecules of water /// heme binding</p>                             | <p>membrane fraction /// endoplasmic reticulum /// endoplasmic reticulum membrane /// integral to plasma membrane /// membrane /// integral to membrane</p>      |
| Y | 209167_at   | GPM6B  | glycoprotein M6B                                       | <p>multicellular organismal development /// nervous system development /// nervous system development /// cell differentiation</p>                                                                                                                                                                                                                                                                                                                                                                                                                                                                                                                                                                                                                                                                                                                                                                                                                                                                                                                                                                                                                                                                                                                                                                                                                                                                                      | ---                                                                                                                                                                                                                                                                                                       | <p>membrane /// integral to membrane /// integral to membrane</p>                                                                                                |
| Y | 202411_at   | IFI27  | interferon, alpha-inducible protein 27                 | <p>apoptosis /// activation of caspase activity /// induction of apoptosis by extracellular signals /// activation of pro-apoptotic gene products</p>                                                                                                                                                                                                                                                                                                                                                                                                                                                                                                                                                                                                                                                                                                                                                                                                                                                                                                                                                                                                                                                                                                                                                                                                                                                                   | ---                                                                                                                                                                                                                                                                                                       | <p>mitochondrion /// mitochondrion /// membrane /// integral to membrane /// integral to membrane</p>                                                            |
| Y | 201627_s_at | INSIG1 | insulin induced gene 1                                 | <p>lipid metabolic process /// triglyceride metabolic process /// cholesterol biosynthetic process /// response to sterol depletion /// metabolic process /// steroid metabolic process /// cholesterol metabolic process /// cell proliferation /// negative regulation of steroid biosynthetic process /// sterol biosynthetic process /// ER-nuclear sterol response pathway /// inner ear morphogenesis /// middle ear morphogenesis /// negative regulation of fat cell differentiation /// negative regulation of fatty acid biosynthetic process /// palate development /// cranial suture morphogenesis</p>                                                                                                                                                                                                                                                                                                                                                                                                                                                                                                                                                                                                                                                                                                                                                                                                     | <p>protein binding</p>                                                                                                                                                                                                                                                                                    | <p>endoplasmic reticulum /// endoplasmic reticulum /// endoplasmic reticulum membrane /// membrane /// integral to membrane</p>                                  |
| Y | 212192_at   | KCTD12 | potassium channel tetramerisation domain containing 12 | <p>potassium ion transport</p>                                                                                                                                                                                                                                                                                                                                                                                                                                                                                                                                                                                                                                                                                                                                                                                                                                                                                                                                                                                                                                                                                                                                                                                                                                                                                                                                                                                          | <p>voltage-gated potassium channel activity /// protein binding /// protein binding</p>                                                                                                                                                                                                                   | <p>plasma membrane /// voltage-gated potassium channel complex /// membrane /// cell junction /// presynaptic membrane /// synapse /// postsynaptic membrane</p> |

|   |             |       |                                                                 |                                                                                                                                                                                                                                                                                                                                                                                                                                                                                                                                                                                                                                                                                                                                                                                                                                                                                                                                                                                                                                                                                                                                                                                                                                                                                                                                                                                                                                                                                     |                                                                                                                                                                                                                                                                           |                                                                                                                                                                                                                     |
|---|-------------|-------|-----------------------------------------------------------------|-------------------------------------------------------------------------------------------------------------------------------------------------------------------------------------------------------------------------------------------------------------------------------------------------------------------------------------------------------------------------------------------------------------------------------------------------------------------------------------------------------------------------------------------------------------------------------------------------------------------------------------------------------------------------------------------------------------------------------------------------------------------------------------------------------------------------------------------------------------------------------------------------------------------------------------------------------------------------------------------------------------------------------------------------------------------------------------------------------------------------------------------------------------------------------------------------------------------------------------------------------------------------------------------------------------------------------------------------------------------------------------------------------------------------------------------------------------------------------------|---------------------------------------------------------------------------------------------------------------------------------------------------------------------------------------------------------------------------------------------------------------------------|---------------------------------------------------------------------------------------------------------------------------------------------------------------------------------------------------------------------|
| Y | 205266_at   | LIF   | leukemia inhibitory factor (cholinergic differentiation factor) | <p>blood vessel remodeling /// immune response /// multicellular organismal development /// embryo implantation /// positive regulation of cell proliferation /// positive regulation of cell proliferation /// positive regulation of cell proliferation /// negative regulation of cell proliferation /// positive regulation of gene-specific transcription from RNA polymerase II promoter /// stem cell maintenance /// lung development /// organ regeneration /// positive regulation of peptidyl-serine phosphorylation /// tyrosine phosphorylation of Stat3 protein /// positive regulation of tyrosine phosphorylation of Stat3 protein /// positive regulation of MAPKKK cascade /// regulation of cell differentiation /// positive regulation of macrophage differentiation /// negative regulation of meiosis /// positive regulation of transcription from RNA polymerase II promoter /// decidualization /// negative regulation of hormone secretion /// lung alveolus development /// muscle organ morphogenesis /// neuron development /// positive regulation of astrocyte differentiation /// leukemia inhibitory factor signaling pathway /// positive regulation of peptidyl-tyrosine phosphorylation /// maternal process involved in female pregnancy /// lung vasculature development /// lung lobe morphogenesis /// trophoblast giant cell differentiation /// spongiotrophoblast differentiation /// negative regulation of ERK1 and ERK2 cascade</p> | <p>receptor binding /// cytokine activity /// cytokine activity /// leukemia inhibitory factor receptor binding /// leukemia inhibitory factor receptor binding /// leukemia inhibitory factor receptor binding /// growth factor activity /// growth factor activity</p> | <p>extracellular region /// extracellular space /// extracellular space</p>                                                                                                                                         |
| Y | 205932_s_at | MSX1  | msh homeobox 1                                                  | <p>negative regulation of transcription from RNA polymerase II promoter /// skeletal system development /// in utero embryonic development /// epithelial to mesenchymal transition /// heart morphogenesis /// transcription /// regulation of transcription, DNA-dependent /// multicellular organismal development /// heart development /// muscle organ development /// negative regulation of cell proliferation /// organ morphogenesis /// mesenchymal cell proliferation /// positive regulation of gene-specific transcription from RNA polymerase II promoter /// embryonic limb morphogenesis /// BMP signaling pathway /// forebrain development /// midbrain development /// odontogenesis /// negative regulation of apoptosis /// regulation of transcription /// negative regulation of transcription, DNA-dependent /// positive regulation of transcription from RNA polymerase II promoter /// cartilage development /// response to protein stimulus /// cellular response to protein stimulus</p>                                                                                                                                                                                                                                                                                                                                                                                                                                                             | <p>DNA binding /// sequence-specific DNA binding transcription factor activity /// protein binding /// transcription repressor activity /// transcription regulator activity /// sequence-specific DNA binding</p>                                                        | <p>nucleus</p>                                                                                                                                                                                                      |
| Y | 204684_at   | NPTX1 | neuronal pentraxin I                                            | <p>transport /// synaptic transmission /// central nervous system development</p>                                                                                                                                                                                                                                                                                                                                                                                                                                                                                                                                                                                                                                                                                                                                                                                                                                                                                                                                                                                                                                                                                                                                                                                                                                                                                                                                                                                                   | <p>metal ion binding</p>                                                                                                                                                                                                                                                  | <p>transport vesicle /// cytoplasmic vesicle</p>                                                                                                                                                                    |
| Y | 201860_s_at | PLAT  | plasminogen activator, tissue                                   | <p>response to hypoxia /// protein modification process /// proteolysis /// proteolysis /// blood coagulation /// smooth muscle cell migration /// synaptic transmission, glutamatergic /// response to peptide hormone stimulus /// negative regulation of proteolysis /// platelet-derived growth factor receptor signaling pathway /// regulation of synaptic plasticity /// blood vessel morphogenesis /// response to glucocorticoid stimulus /// response to cAMP</p>                                                                                                                                                                                                                                                                                                                                                                                                                                                                                                                                                                                                                                                                                                                                                                                                                                                                                                                                                                                                         | <p>catalytic activity /// serine-type endopeptidase activity /// serine-type endopeptidase activity /// serine-type endopeptidase activity /// protein binding /// peptidase activity /// serine-type peptidase activity /// hydrolase activity</p>                       | <p>extracellular region /// extracellular region /// extracellular space /// cytoplasm /// cytoplasm /// cell surface /// stored secretory granule /// extracellular matrix /// apical part of cell /// synapse</p> |
| Y | 210809_s_at | POSTN | periostin, osteoblast specific factor                           | <p>skeletal system development /// cell adhesion /// cell adhesion</p>                                                                                                                                                                                                                                                                                                                                                                                                                                                                                                                                                                                                                                                                                                                                                                                                                                                                                                                                                                                                                                                                                                                                                                                                                                                                                                                                                                                                              | <p>heparin binding /// heparin binding</p>                                                                                                                                                                                                                                | <p>extracellular region /// proteinaceous extracellular matrix /// proteinaceous extracellular matrix /// extracellular matrix</p>                                                                                  |

|   |             |         |                                                                     |                                                                                                                                                                                                                                                                                                                                                                                                                                                                                                                     |                                                                                                                                                                                                                                                                                                                                                                                    |                                                                                                                                                    |
|---|-------------|---------|---------------------------------------------------------------------|---------------------------------------------------------------------------------------------------------------------------------------------------------------------------------------------------------------------------------------------------------------------------------------------------------------------------------------------------------------------------------------------------------------------------------------------------------------------------------------------------------------------|------------------------------------------------------------------------------------------------------------------------------------------------------------------------------------------------------------------------------------------------------------------------------------------------------------------------------------------------------------------------------------|----------------------------------------------------------------------------------------------------------------------------------------------------|
| Y | 206631_at   | PTGER2  | prostaglandin E receptor 2 (subtype EP2), 53kDa                     | signal transduction /// G-protein coupled receptor protein signaling pathway /// G-protein coupled receptor protein signaling pathway /// regulation of cell proliferation                                                                                                                                                                                                                                                                                                                                          | signal transducer activity /// receptor activity /// G-protein coupled receptor activity /// prostaglandin E receptor activity /// prostaglandin E receptor activity                                                                                                                                                                                                               | plasma membrane /// plasma membrane /// integral to plasma membrane /// membrane /// integral to membrane                                          |
| Y | 203185_at   | RASSF2  | Ras association (RalGDS/AF-6) domain family member 2                | cell cycle /// signal transduction                                                                                                                                                                                                                                                                                                                                                                                                                                                                                  | protein binding /// protein binding                                                                                                                                                                                                                                                                                                                                                | nucleus<br>Golgi membrane /// endoplasmic reticulum /// endoplasmic reticulum membrane /// Golgi apparatus /// membrane /// integral to membrane   |
| Y | 219416_at   | SCARA3  | scavenger receptor class A, member 3                                | response to oxidative stress /// UV protection                                                                                                                                                                                                                                                                                                                                                                                                                                                                      | scavenger receptor activity<br>stearoyl-CoA 9-desaturase activity /// stearoyl-CoA 9-desaturase activity /// iron ion binding /// oxidoreductase activity /// oxidoreductase activity, acting on paired donors, with oxidation of a pair of donors resulting in the reduction of molecular oxygen to two molecules of water                                                        | endoplasmic reticulum /// endoplasmic reticulum /// endoplasmic reticulum membrane /// membrane /// integral to membrane /// nuclear membrane      |
| Y | 200832_s_at | SCD     | stearoyl-CoA desaturase (delta-9-desaturase)                        | lipid metabolic process /// fatty acid biosynthetic process /// lipid biosynthetic process /// oxidation reduction                                                                                                                                                                                                                                                                                                                                                                                                  | ---                                                                                                                                                                                                                                                                                                                                                                                | membrane /// integral to membrane                                                                                                                  |
| Y | 219685_at   | TMEM35  | transmembrane protein 35                                            | ---                                                                                                                                                                                                                                                                                                                                                                                                                                                                                                                 | ---                                                                                                                                                                                                                                                                                                                                                                                | cytoplasm /// cytoskeleton /// actin cytoskeleton /// membrane                                                                                     |
| N | 209789_at   | CORO2B  | coronin, actin binding protein, 2B                                  | actin cytoskeleton organization<br>regulation of cyclin-dependent protein kinase activity /// regulation of gene expression by genetic imprinting /// signal transduction /// small GTPase mediated signal transduction /// small GTPase mediated signal transduction                                                                                                                                                                                                                                               | actin binding /// actin binding                                                                                                                                                                                                                                                                                                                                                    | plasma membrane /// membrane                                                                                                                       |
| N | 215506_s_at | DIRAS3  | DIRAS family, GTP-binding RAS-like 3                                | inactivation of MAPK activity /// negative regulation of protein phosphorylation /// protein dephosphorylation /// response to organic cyclic substance /// dephosphorylation /// cell differentiation /// peptidyl-tyrosine dephosphorylation /// response to drug /// positive regulation of apoptosis /// response to nitrosative stress /// regulation of heart growth /// negative regulation of ERK1 and ERK2 cascade /// negative regulation of ERK1 and ERK2 cascade /// response to growth factor stimulus | nucleotide binding /// GTPase activity /// GTPase activity /// GTP binding                                                                                                                                                                                                                                                                                                         | plasma membrane /// membrane                                                                                                                       |
| N | 208891_at   | DUSP6   | dual specificity phosphatase 6                                      | signal transduction /// neuropeptide signaling pathway /// neuropeptide signaling pathway                                                                                                                                                                                                                                                                                                                                                                                                                           | phosphoprotein phosphatase activity /// protein tyrosine phosphatase activity /// protein tyrosine phosphatase activity /// protein binding /// protein tyrosine/serine/threonine phosphatase activity /// hydrolase activity /// phosphatase activity /// MAP kinase tyrosine/serine/threonine phosphatase activity /// MAP kinase tyrosine/serine/threonine phosphatase activity | nucleoplasm /// cytoplasm /// cytoplasm extracellular region /// extracellular region /// extracellular space                                      |
| N | 206326_at   | GRP     | gastrin-releasing peptide                                           | carbohydrate metabolic process /// glycogen metabolic process /// glycogen catabolic process /// glycogen catabolic process                                                                                                                                                                                                                                                                                                                                                                                         | receptor binding /// neuropeptide hormone activity phosphorylase activity /// sugar binding /// drug binding /// glycogen phosphorylase activity /// transferase activity /// transferase activity, transferring glycosyl groups /// pyridoxal phosphate binding /// protein homodimerization activity                                                                             | soluble fraction /// cytoplasm /// axon                                                                                                            |
| N | 201481_s_at | PYGB    | phosphorylase, glycogen; brain                                      | inactivation of MAPK activity /// regulation of G-protein coupled receptor protein signaling pathway /// negative regulation of signal transduction                                                                                                                                                                                                                                                                                                                                                                 | signal transducer activity /// GTPase activator activity /// GTPase activator activity /// calmodulin binding neurotransmitter transporter activity /// neurotransmitter: sodium symporter activity /// amino acid transmembrane transporter activity /// symporter activity                                                                                                       | membrane fraction /// cytoplasm /// cytosol /// plasma membrane                                                                                    |
| N | 204337_at   | RGS4    | regulator of G-protein signaling 4                                  | transport /// neurotransmitter transport /// neurotransmitter transport /// amino acid transport female pregnancy /// blood coagulation /// blood coagulation /// embryo development /// response to X-ray /// negative regulation of platelet activation /// negative regulation of blood coagulation /// response to lipopolysaccharide /// response to cAMP /// negative regulation of fibrinolysis                                                                                                              | receptor activity /// receptor activity /// transmembrane receptor activity /// binding /// calcium ion binding /// calcium ion binding /// protein binding                                                                                                                                                                                                                        | plasma membrane /// integral to plasma membrane /// membrane /// integral to membrane /// integral to membrane                                     |
| N | 206376_at   | SLC6A15 | solute carrier family 6 (neutral amino acid transporter), member 15 | transport /// neurotransmitter transport /// neurotransmitter transport /// amino acid transport female pregnancy /// blood coagulation /// blood coagulation /// embryo development /// response to X-ray /// negative regulation of platelet activation /// negative regulation of blood coagulation /// response to lipopolysaccharide /// response to cAMP /// negative regulation of fibrinolysis                                                                                                              | receptor activity /// receptor activity /// transmembrane receptor activity /// binding /// calcium ion binding /// calcium ion binding /// protein binding                                                                                                                                                                                                                        | extracellular space /// plasma membrane /// plasma membrane /// integral to plasma membrane /// cell surface /// membrane /// integral to membrane |
| N | 203887_s_at | THBD    | thrombomodulin                                                      | lipopolysaccharide /// response to cAMP /// negative regulation of fibrinolysis                                                                                                                                                                                                                                                                                                                                                                                                                                     | receptor activity /// receptor activity /// transmembrane receptor activity /// binding /// calcium ion binding /// calcium ion binding /// protein binding                                                                                                                                                                                                                        | extracellular space /// plasma membrane /// plasma membrane /// integral to plasma membrane /// cell surface /// membrane /// integral to membrane |
